# Supplementary material for: Insight into the Anticancer Activity of Copper(II) 5-Methylenetrimethylammonium-Thiosemicarbazonates and Their Interaction with Organic Cation Transporters
Source: PubMed Central journal article supplement (PMC7565988; doi:10.3390/biom10091213), 2020-08-20
Supplement: biomolecules-10-01213-s001.pdf [file biomolecules-10-01213-s001.pdf]

# Supplementary materials

## Insight into the Anticancer Activity of Copper(II) 5-Methylenetrimethylammonium-Thiosemicarbazonates and Their Interaction with Organic Cation Transporters

Miljan N. M. Milunović<sup>1,\*</sup>, Oleg Palamarcuic<sup>2</sup>, Angela Sirbu<sup>2</sup>, Sergiu Shova<sup>3</sup>, Dan Dumitrescu<sup>4</sup>, Dana Dvoranová<sup>5</sup>, Peter Rapta<sup>5</sup>, Tatsiana V. Petrasheuskaya<sup>6,7</sup>, Eva A. Enyedy<sup>6,7</sup>, Gabriella Spengler<sup>7,8</sup>, Marija Ilic<sup>9,10,11</sup>, Harald H. Sitte<sup>10</sup>, Gert Lubec<sup>11</sup> and Vladimir B. Arion<sup>1,\*</sup>

<sup>1</sup> Institute of Inorganic Chemistry, Faculty of Chemistry, University of Vienna, Währinger Strasse 42, A-1090 Vienna, Austria

<sup>2</sup> Department of Chemistry, Moldova State University, A. Mateevici Street 60, MD-2009 Chisinau, Republic of Moldova; palamarcuico@gmail.com (O.P.); sirbuangela@yandex.ru (A.S.)

<sup>3</sup> Petru Poni Institute of Macromolecular Chemistry, Aleea Grigore Ghica Voda, Nr. 41A, 700487 Iasi, Romania; shova@icmpp.ro

<sup>4</sup> Elettra - Sincrotrone Trieste S.C.p.A, Strada Statale 14 - km 163,5 in AREA Science Park, 34149 Basovizza, Trieste, Italy; dan.dumitrescu@gmail.com

<sup>5</sup> Institute of Physical Chemistry and Chemical Physics, Faculty of Chemical and Food Technology, Slovak University of Technology in Bratislava, Radlinského 9, SK-81237 Bratislava, Slovakia; dana.dvoranova@stuba.sk (D.D.); peter.rapta@stuba.sk (P.R.)

<sup>6</sup> Department of Inorganic and Analytical Chemistry, Interdisciplinary Excellence Centre, University of Szeged, Dóm tér 7, H-6720 Szeged, Hungary; petrashev\_tanya@tut.by (T.V.P.); enyedy@chem.u-szeged.hu (E.A.E)

<sup>7</sup> MTA-SZTE Lendület Functional Metal Complexes Research Group, University of Szeged, Dóm tér 7, H-6720 Szeged, Hungary; spengler.gabriella@med.u-szeged.hu

<sup>8</sup> Department of Medical Microbiology and Immunobiology, University of Szeged, Dóm tér 10, H-6720 Szeged, Hungary

<sup>9</sup> Department of Pharmaceutical Chemistry, Faculty of Life Sciences, University of Vienna, A-1090 Vienna, Austria; marija.ii.ilic@gmail.com

<sup>10</sup> Institute of Pharmacology, Centre for Physiology and Pharmacology, Medical University of Vienna, A-1090 Vienna, Austria; harald.sitte@meduniwien.ac.at

<sup>11</sup> Neuroproteomics, Paracelsus Private Medical University, post code Salzburg, Austria; gert.lubec@lubeclab.com

\* Correspondence: miljan.milunovic@univie.ac.at (M.N.M.M.); vladimir.arion@univie.ac.at (V.B.A.)

| Table of Contents                                                                                                                                                                       | Page |
|-----------------------------------------------------------------------------------------------------------------------------------------------------------------------------------------|------|
| Scheme S1. Reaction pathway to [H <sub>2</sub> L <sup>1-4</sup> ]Cl and copper(II) complexes 1–4                                                                                        | 3    |
| Table S1-S3. Bond lengths and angles for 2                                                                                                                                              | 3–4  |
| Figure S1–S17. <sup>1</sup> H, <sup>13</sup> C, HSQC and HMBC NMR spectra of [H <sub>2</sub> L <sup>R</sup> ]Cl in [D <sub>6</sub> ]DMSO                                                | 5–13 |
| Figure S18. UV/Vis absorption spectra of copper(II) complexes 1–4 in aqueous solutions                                                                                                  | 13   |
| Figure S19. UV/Vis absorption spectra of [H <sub>2</sub> L <sup>Me</sup> ]Cl and 2 in aqueous solution before and after partitioning, and in the n-octanol phase after the partitioning | 14   |
| Figure S20. Chemical shifts of the CH(4) proton of the major (●) and minor (●) isomers of [H <sub>2</sub> L <sup>H</sup> ]Cl                                                            | 14   |
| Figure S21. Time-dependent UV/Vis absorption spectra of complex 1 in the presence of GSH before and after mixing their solutions in a tandem cuvette, and after the bubbling of oxygen  | 14   |
| Figure S22. UV/Vis spectra measured during cyclic voltammetry of 2 in MeCN/ <i>n</i> Bu <sub>4</sub> NPF <sub>6</sub>                                                                   | 15   |
| Figure S23. Cyclic voltammograms of 1 and 3 in phosphate buffer solution + 0.1 M KCl (pH 7)                                                                                             | 16   |
| Figure S24. Cyclic voltammograms of 2 in DMSO/ <i>n</i> Bu <sub>4</sub> NPF <sub>6</sub>                                                                                                | 17   |
| Figure S25. UV/Vis spectra of 2 in DMSO/ <i>n</i> Bu <sub>4</sub> NPF <sub>6</sub> measured during cyclic voltammetry                                                                   | 18   |

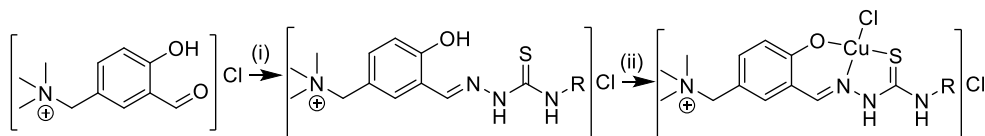

**Scheme S1.** Reaction pathway to [H<sub>2</sub>L<sup>1-4</sup>]Cl and copper(II) complexes **1-4**, R = H, Me, Et or Ph. Reaction conditions: (i) corresponding thiosemicarbazide, MeOH/H<sub>2</sub>O = 1:3, 65 °C, 20 min. (ii) CuCl<sub>2</sub>·2H<sub>2</sub>O, H<sub>2</sub>O, 50 °C.

**Table S1.** Bond lengths [Å] and angles [°] for **2**.

|         | A          | B          |            | A          | B         |
|---------|------------|------------|------------|------------|-----------|
| Cu1-Cl1 | 2.2397(10) | 2.2361(11) | Cl1-Cu1-S1 | 91.41(4)   | 92.04(5)  |
| Cu1-S1  | 2.2577(10) | 2.2453(10) | O1-Cu1-Cl1 | 90.44(7)   | 91.26(8)  |
| Cu1-O1  | 1.910(2)   | 1.898(2)   | O1-Cu1-S1  | 175.84(7)  | 171.93(8) |
| Cu1-N1  | 1.960(2)   | 1.968(3)   | O1-Cu1-N1  | 92.44(10)  | 92.18(10) |
| S1-C8   | 1.706(3)   | 1.707(4)   | N1-Cu1-Cl1 | 176.49(8)  | 168.21(9) |
| O1-C1   | 1.305(4)   | 1.310(4)   | N1-Cu1-S1  | 85.85(8)   | 86.06(8)  |
| N1-N2   | 1.380(4)   | 1.378(4)   | C8-S1-Cu1  | 97.25(11)  | 97.11(12) |
| N1-C7   | 1.294(4)   | 1.291(4)   | C1-O1-Cu1  | 128.8(2)   | 129.1(2)  |
| N2-C8   | 1.338(4)   | 1.349(4)   | N2-N1-Cu1  | 117.53(19) | 116.8(2)  |
| N3-C8   | 1.317(4)   | 1.304(5)   | C7-N1-Cu1  | 126.3(2)   | 126.4(2)  |
| N3-C9   | 1.453(4)   | 1.371(10)  | C7-N1-N2   | 116.1(3)   | 116.7(3)  |
| N4-C10  | 1.533(4)   | 1.523(4)   | C8-N2-N1   | 119.3(3)   | 119.3(3)  |
| N4-C11  | 1.494(5)   | 1.483(5)   | C8-N3-C9   | 123.9(3)   | 130.2(5)  |
| N4-C12  | 1.490(5)   | 1.493(4)   | C11-N4-C10 | 111.0(3)   | 110.7(3)  |
| N4-C13  | 1.497(5)   | 1.503(5)   | C11-N4-C13 | 109.1(3)   | 109.8(4)  |
| C1-C2   | 1.401(4)   | 1.403(5)   | C12-N4-C10 | 107.2(3)   | 107.8(3)  |
| C1-C6   | 1.427(4)   | 1.428(4)   | C12-N4-C11 | 109.6(3)   | 109.2(3)  |
| C2-C3   | 1.383(5)   | 1.368(5)   | C12-N4-C13 | 109.0(3)   | 108.6(3)  |
| C3-C4   | 1.401(5)   | 1.406(5)   | C13-N4-C10 | 110.8(3)   | 110.8(3)  |
| C4-C5   | 1.370(5)   | 1.363(5)   | O1-C1-C2   | 119.4(3)   | 119.1(3)  |
| C4-C10  | 1.504(4)   | 1.500(4)   | O1-C1-C6   | 123.3(3)   | 123.4(3)  |
| C5-C6   | 1.413(4)   | 1.410(4)   | C2-C1-C6   | 117.3(3)   | 117.5(3)  |
| C6-C7   | 1.420(4)   | 1.418(4)   | C3-C2-C1   | 121.7(3)   | 121.7(3)  |
| N3-C9X  | -          | 1.282(9)   | C2-C3-C4   | 121.3(3)   | 121.3(3)  |
|         |            |            | C3-C4-C10  | 119.8(3)   | 120.9(3)  |
|         |            |            | C5-C4-C3   | 118.1(3)   | 117.9(3)  |
|         |            |            | C5-C4-C10  | 122.1(3)   | 121.1(3)  |
|         |            |            | C4-C5-C6   | 122.2(3)   | 122.8(3)  |
|         |            |            | C5-C6-C1   | 119.4(3)   | 118.7(3)  |
|         |            |            | C5-C6-C7   | 116.6(3)   | 117.6(3)  |
|         |            |            | C7-C6-C1   | 124.0(3)   | 123.6(3)  |
|         |            |            | N1-C7-C6   | 125.1(3)   | 125.2(3)  |
|         |            |            | N2-C8-S1   | 120.0(2)   | 119.6(3)  |

|  |           |          |          |
|--|-----------|----------|----------|
|  | N3-C8-S1  | 122.7(2) | 122.0(3) |
|  | N3-C8-N2  | 117.3(3) | 118.4(4) |
|  | C4-C10-N4 | 115.3(3) | 115.3(3) |

**Table S2.** Bond lengths [Å] and angles [°] for **3**.

|                |                 |                                 |                 |            |            |           |          |
|----------------|-----------------|---------------------------------|-----------------|------------|------------|-----------|----------|
| <b>Cu1-Cl1</b> | <b>2.240(2)</b> | <b>N4-C11</b>                   | <b>1.466(9)</b> | Cl1-Cu1-S1 | 89.72(8)   | O1-C1-C2  | 119.1(6) |
| Cu1-S1         | 2.245(2)        | N4-C12                          | 1.491(8)        | O1-Cu1-Cl1 | 91.74(16)  | O1-C1-C6  | 124.1(6) |
| Cu1-O1         | 1.899(5)        | N4-C13                          | 1.500(8)        | O1-Cu1-S1  | 175.94(15) | C6-C1-C2  | 116.8(6) |
| Cu1-N1         | 1.979(5)        | C1-C2                           | 1.408(10)       | O1-Cu1-N1  | 92.5(2)    | C3-C2-C1  | 122.5(6) |
| S1-C8          | 1.697(8)        | C1-C6                           | 1.405(9)        | N1-Cu1-Cl1 | 171.61(15) | C2-C3-C4  | 121.3(6) |
| O1-C1          | 1.311(8)        | C2-C3                           | 1.369(9)        | N1-Cu1-S1  | 86.51(17)  | C3-C4-C10 | 120.5(6) |
| N1-N2          | 1.370(7)        | C3-C4                           | 1.390(9)        | C8-S1-Cu1  | 97.0(3)    | C5-C4-C3  | 117.9(6) |
| N1-C7          | 1.285(8)        | C4-C5                           | 1.365(9)        | C1-O1-Cu1  | 128.4(4)   | C5-C4-C10 | 121.6(6) |
| N2-C8          | 1.354(9)        | C4-C10                          | 1.497(8)        | N2-N1-Cu1  | 116.5(4)   | C4-C5-C6  | 122.2(6) |
| N3-C8          | 1.317(9)        | C5-C6                           | 1.434(8)        | C7-N1-Cu1  | 125.6(5)   | C1-C6-C5  | 119.2(6) |
| N3-C9          | 1.465(9)        | C6-C7                           | 1.433(8)        | C7-N1-N2   | 117.7(6)   | C1-C6-C7  | 123.9(5) |
| N4-C10         | 1.533(7)        | C9-C14                          | 1.477(12)       | C8-N2-N1   | 119.3(6)   | C7-C6-C5  | 116.8(5) |
|                |                 | $^11 - x, + y, \frac{3}{2} - z$ |                 | C8-N3-C9   | 122.4(7)   | N1-C7-C6  | 125.1(6) |
|                |                 |                                 |                 | C11-N4-C10 | 110.3(5)   | N2-C8-S1  | 120.6(6) |
|                |                 |                                 |                 | C11-N4-C12 | 109.5(6)   | N3-C8-S1  | 122.2(6) |
|                |                 |                                 |                 | C11-N4-C13 | 110.9(6)   | N3-C8-N2  | 117.2(7) |
|                |                 |                                 |                 | C12-N4-C10 | 107.7(5)   | N3-C9-C14 | 109.8(7) |
|                |                 |                                 |                 | C12-N4-C13 | 108.5(5)   | C4-C10-N4 | 115.4(5) |
|                |                 |                                 |                 | C13-N4C10  | 110.0(5)   |           |          |

**Table S3.** Bond lengths [Å] and angles [°] for **4**.

|                |                   |              |                 |            |            |             |          |
|----------------|-------------------|--------------|-----------------|------------|------------|-------------|----------|
| <b>Cu1-Cl1</b> | <b>2.2653(11)</b> | <b>C1-C2</b> | <b>1.409(6)</b> | S1-Cu1-Cl1 | 92.65(4)   | C3-C2-C1    | 121.6(4) |
| Cu1-S1         | 2.2562(12)        | C1-C6        | 1.416(5)        | O1-Cu1-Cl1 | 89.87(8)   | C2-C3-C4    | 122.0(4) |
| Cu1-O1         | 1.908(3)          | C2-C3        | 1.369(6)        | O1-Cu1-S1  | 177.45(9)  | C3-C4-C15   | 120.4(4) |
| Cu1-N1         | 1.971(3)          | C3-C4        | 1.395(5)        | O1-Cu1-N1  | 91.49(12)  | C5-C4-C3    | 117.2(4) |
| S1-C8          | 1.712(4)          | C4-C5        | 1.374(5)        | N1-Cu1-Cl1 | 171.12(10) | C5-C4-C15   | 122.4(4) |
| O1-C1          | 1.311(4)          | C4-C15       | 1.498(5)        | N1-Cu1-S1  | 85.96(9)   | C4-C5-C6    | 122.7(4) |
| N1-N2          | 1.385(4)          | C5-C6        | 1.410(5)        | C8-S1-Cu1  | 97.13(14)  | C1-C6-C7    | 123.4(4) |
| N1-C7          | 1.290(5)          | C6-C7        | 1.429(5)        | C1-O1-Cu1  | 128.9(3)   | C5-C6-C1    | 119.3(4) |
| N2-C8          | 1.339(5)          | C9-C10       | 1.386(6)        | N2-N1-Cu1  | 117.2(2)   | C5-C6-C7    | 117.3(3) |
| N3-C8          | 1.317(5)          | C9-C14       | 1.383(6)        | C7-N1-Cu1  | 127.0(3)   | N1-C7-C6    | 124.8(3) |
| N3-C9          | 1.432(5)          | C10-C11      | 1.363(6)        | C7-N1-N2   | 115.8(3)   | N2-C8-S1    | 120.3(3) |
| N4-C15         | 1.519(5)          | C11-C12      | 1.360(7)        | C8-N2-N1   | 119.0(3)   | N3-C8-S1    | 119.5(3) |
| N4-C16         | 1.496(5)          | C12-C13      | 1.387(7)        | C8-N3-C9   | 128.2(3)   | N3-C8-N2    | 120.2(3) |
| N4-C17         | 1.491(5)          | C13-C14      | 1.382(6)        | C16-N4-C15 | 110.9(3)   | C10-C9-N3   | 117.3(4) |
| N4-C18         | 1.486(5)          |              |                 | C17-N4-C15 | 108.5(3)   | C14-C9-N3   | 121.9(4) |
|                |                   |              |                 | C17-N4-C16 | 109.0(4)   | C14-C9-C10  | 120.5(4) |
|                |                   |              |                 | C18-N4-C15 | 110.5(3)   | C11-C10-C9  | 120.2(5) |
|                |                   |              |                 | C18-N4-C16 | 109.0(3)   | C12-C11-C10 | 120.4(5) |

|  |            |          |             |          |
|--|------------|----------|-------------|----------|
|  | C18-N4-C17 | 108.9(3) | C11-C12-C13 | 119.9(5) |
|  | O1-C1-C2   | 119.1(4) | C14-C13-C12 | 120.8(5) |
|  | O1-C1-C6   | 123.8(4) | C13-C14-C9  | 118.3(5) |
|  | C2-C1-C6   | 117.1(4) | C4-C15-N4   | 114.8(3) |

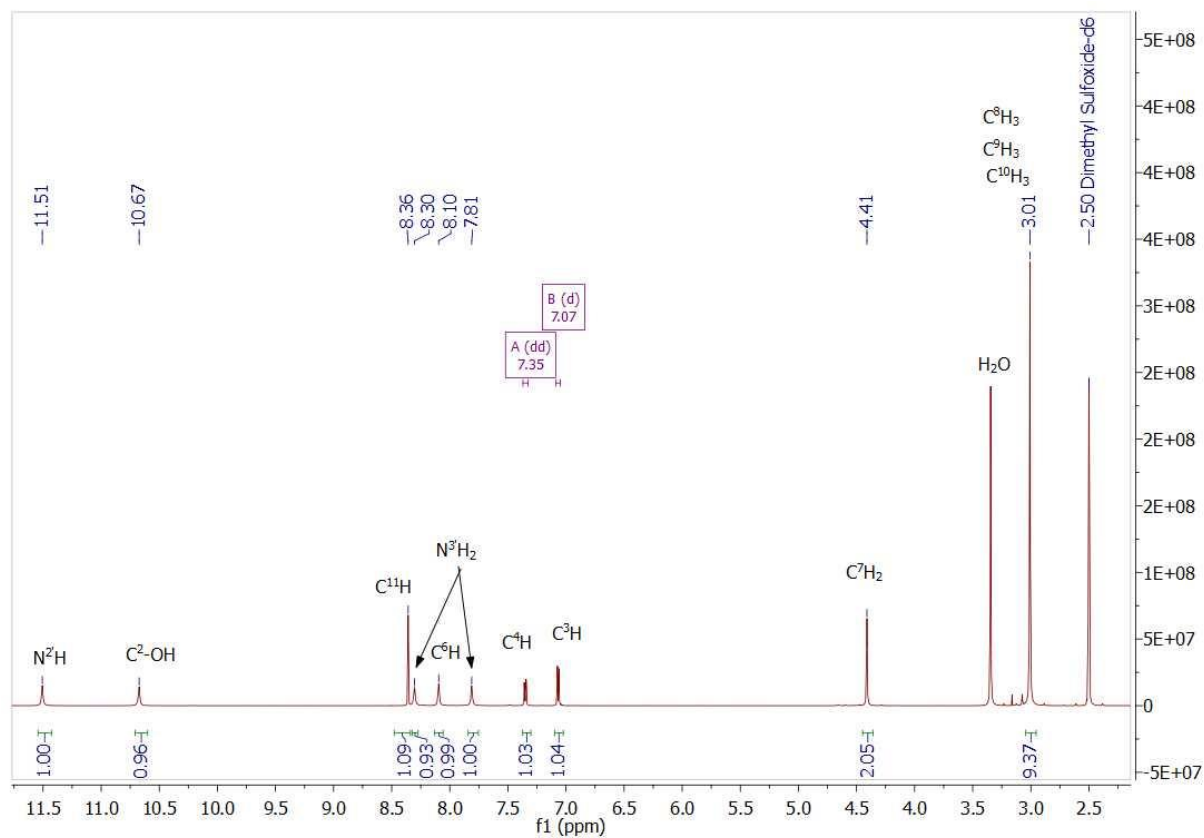

**Figure 1.**  $^1\text{H}$  NMR spectrum of  $[\text{H}_2\text{L}^{\text{H}}]\text{Cl}$  in  $[\text{D}_6]\text{DMSO}$ .

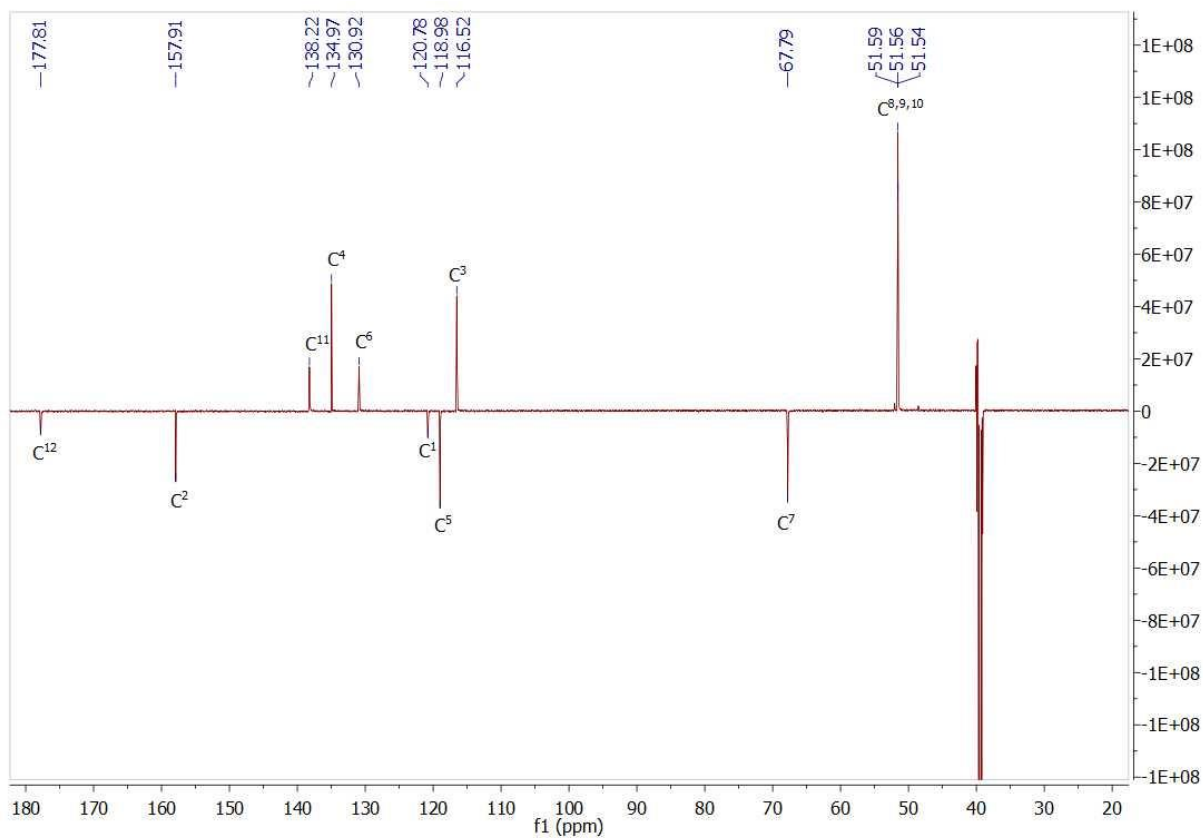

Figure 2.  $^{13}\text{C}$  NMR spectrum of  $[\text{H}_2\text{L}^{\text{H}}]\text{Cl}$  in  $[\text{D}_6]\text{DMSO}$ .

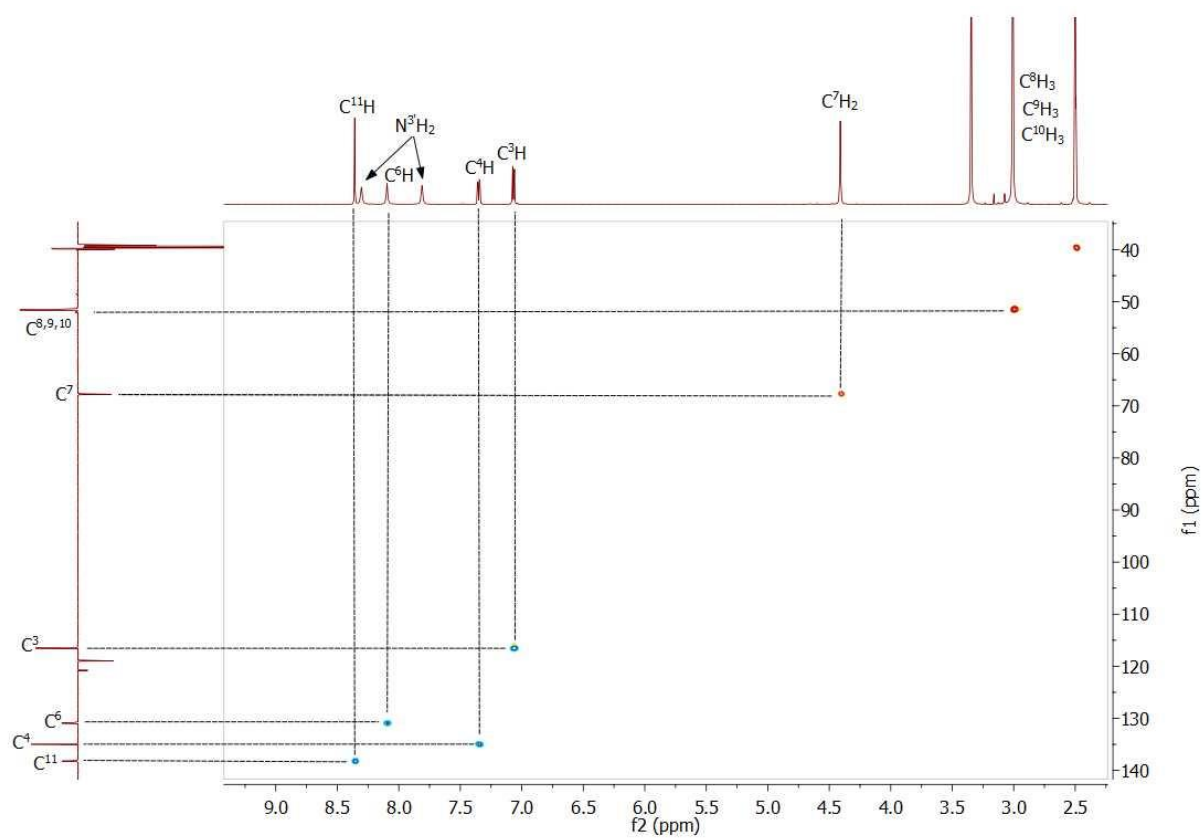

Figure 3.  $^1\text{H}$ ,  $^{13}\text{C}$  HSQC NMR spectrum of  $[\text{H}_2\text{L}^{\text{H}}]\text{Cl}$  in  $[\text{D}_6]\text{DMSO}$ .

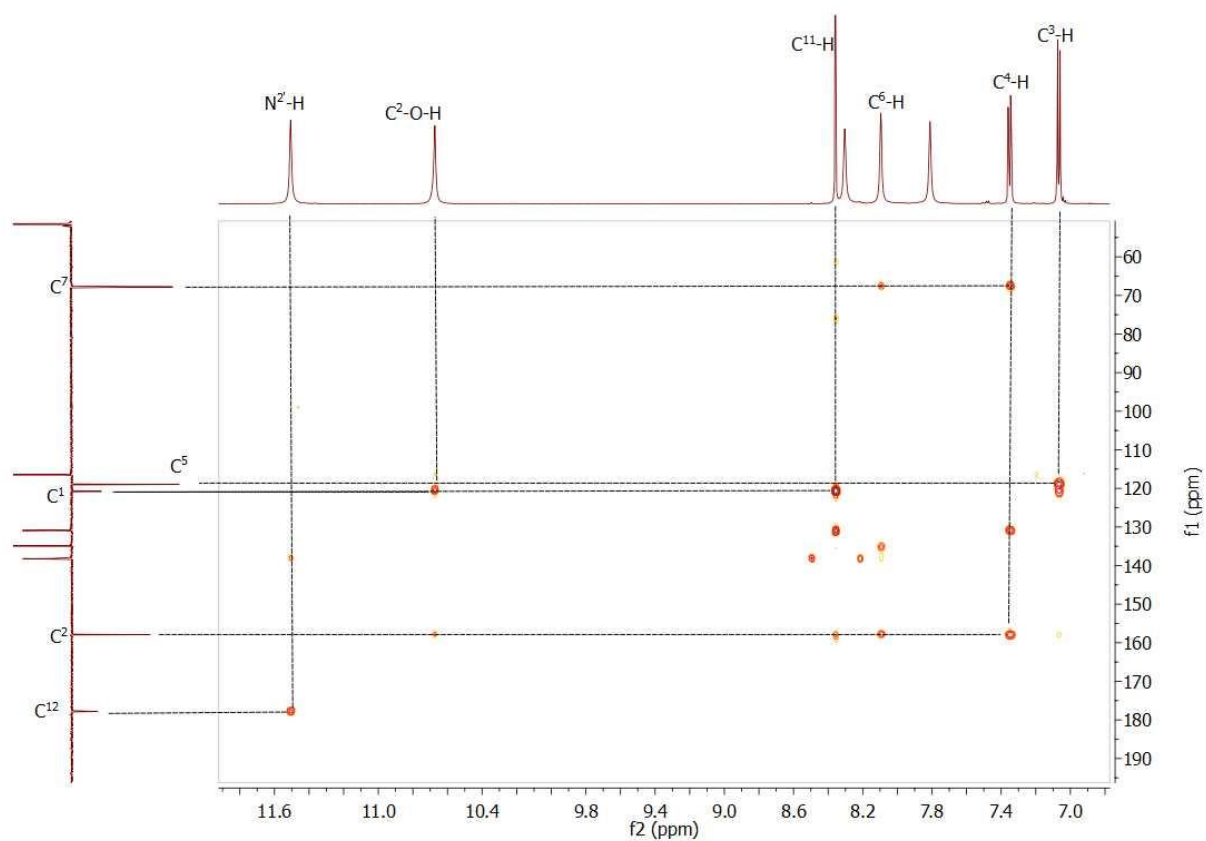

Figure 4.  $^1\text{H}$ ,  $^{13}\text{C}$  HMBC NMR spectrum of  $[\text{H}_2\text{L}^{\text{H}}]\text{Cl}$  in  $[\text{D}_6]\text{DMSO}$ .

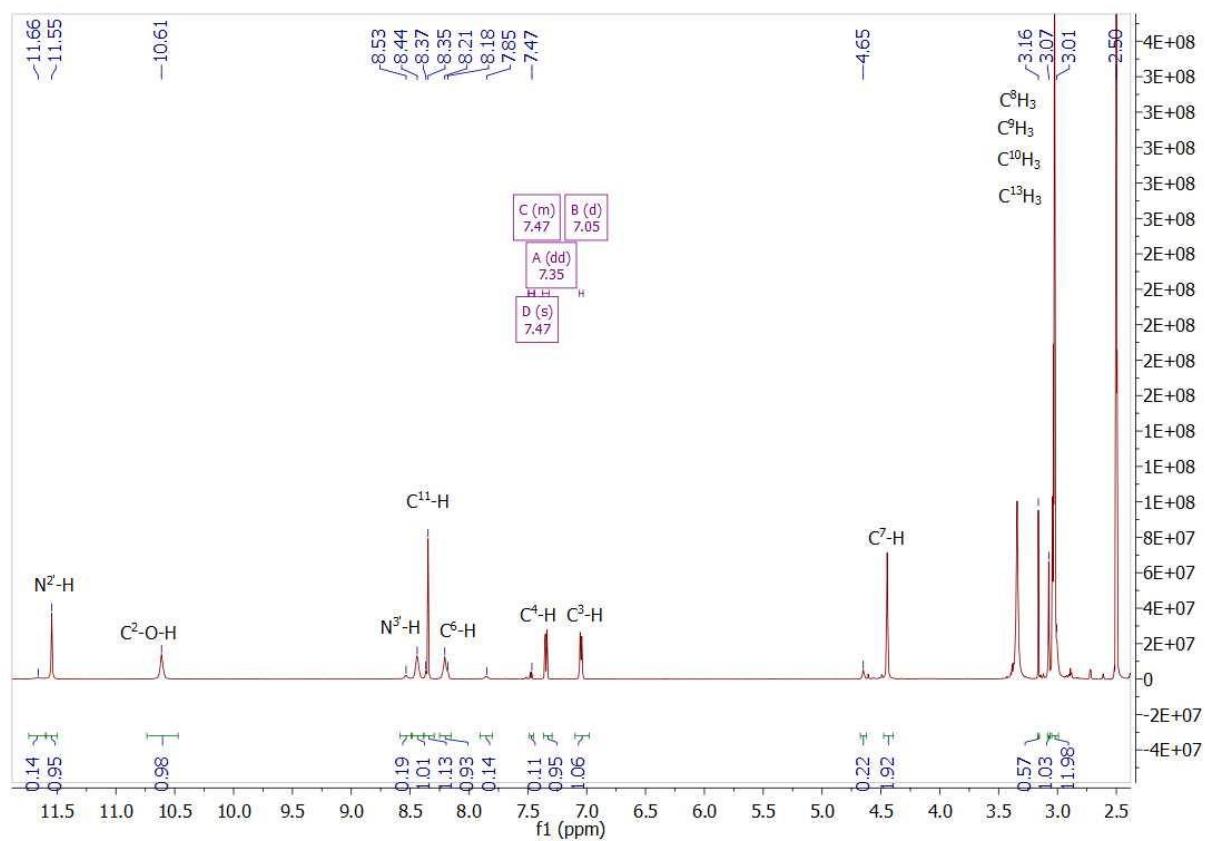

Figure 5.  $^1\text{H}$  NMR spectrum of  $[\text{H}_2\text{L}^{\text{Me}}]\text{Cl}$  in  $[\text{D}_6]\text{DMSO}$ .

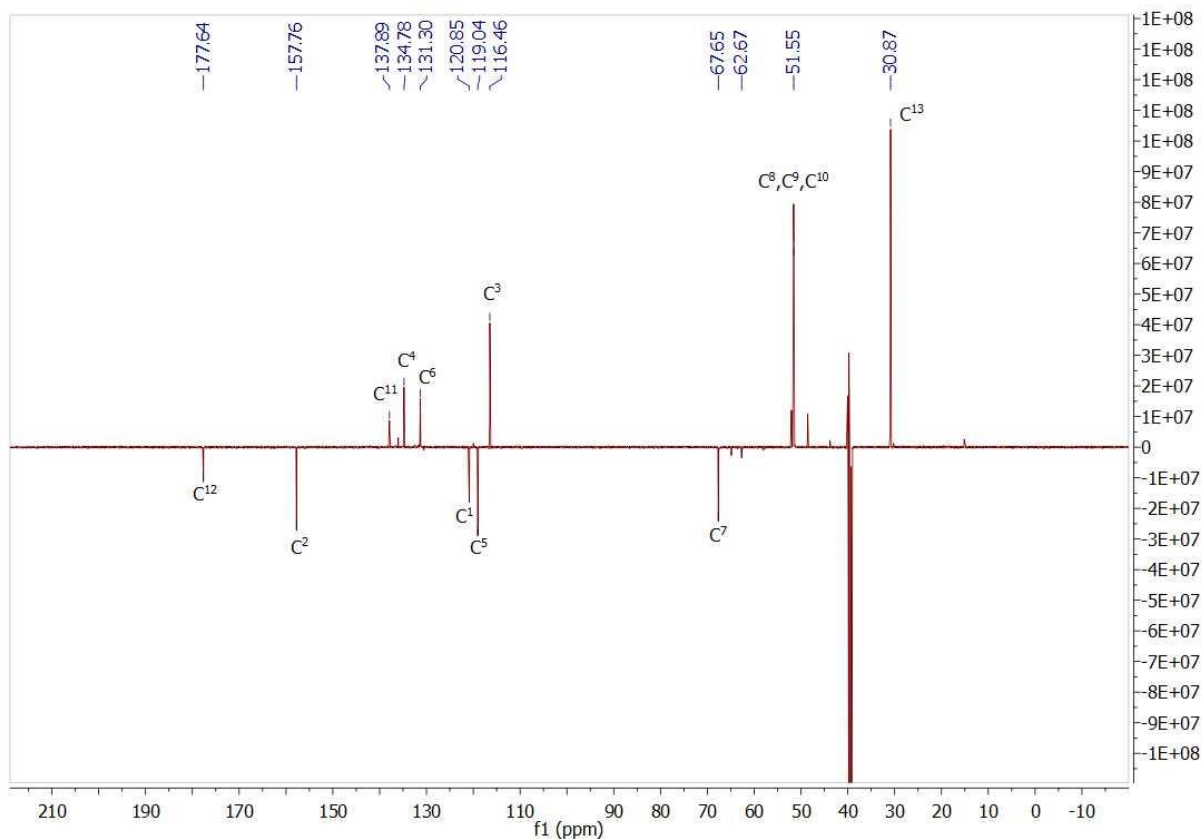

Figure 6.  $^{13}\text{C}$  NMR spectrum of  $[\text{H}_2\text{L}^{\text{Me}}]\text{Cl}$  in  $[\text{D}_6]\text{DMSO}$ .

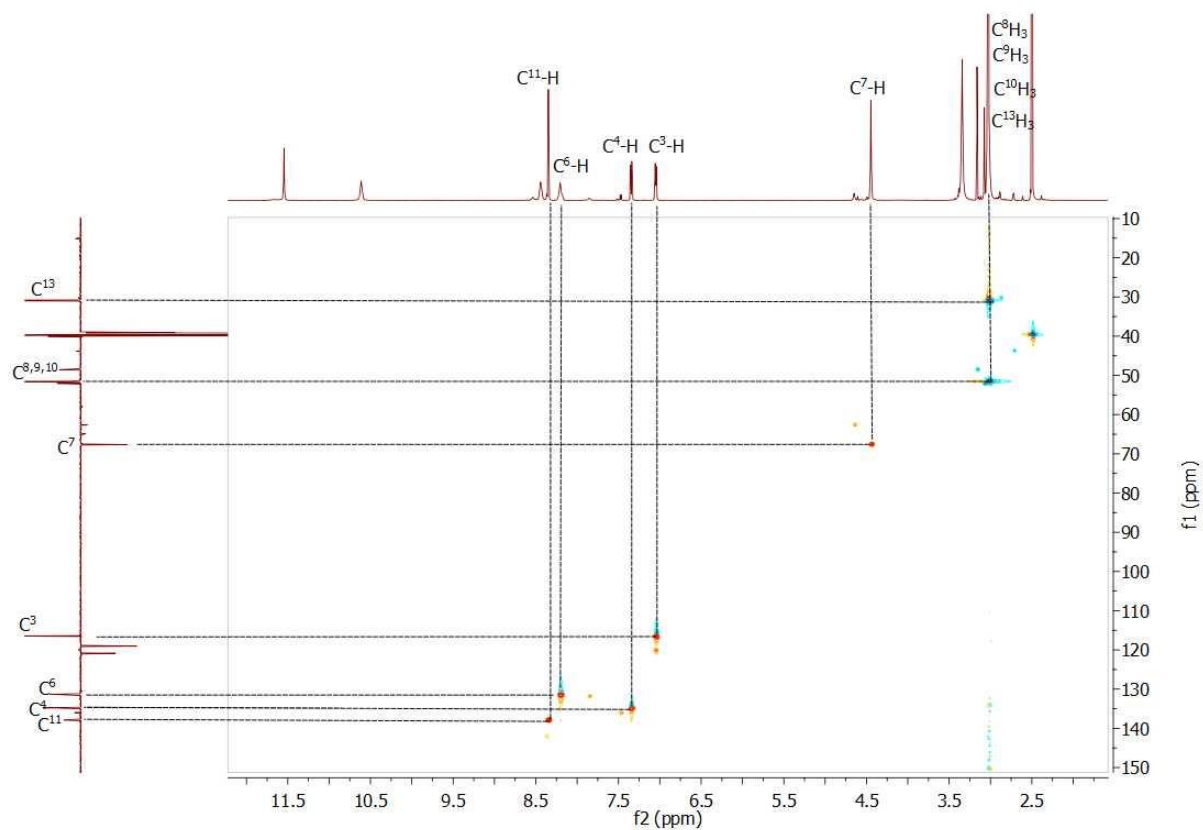

Figure 7.  $^1\text{H}$ ,  $^{13}\text{C}$  HSQC NMR spectrum of  $[\text{H}_2\text{L}^{\text{Me}}]\text{Cl}$  in  $[\text{D}_6]\text{DMSO}$ .

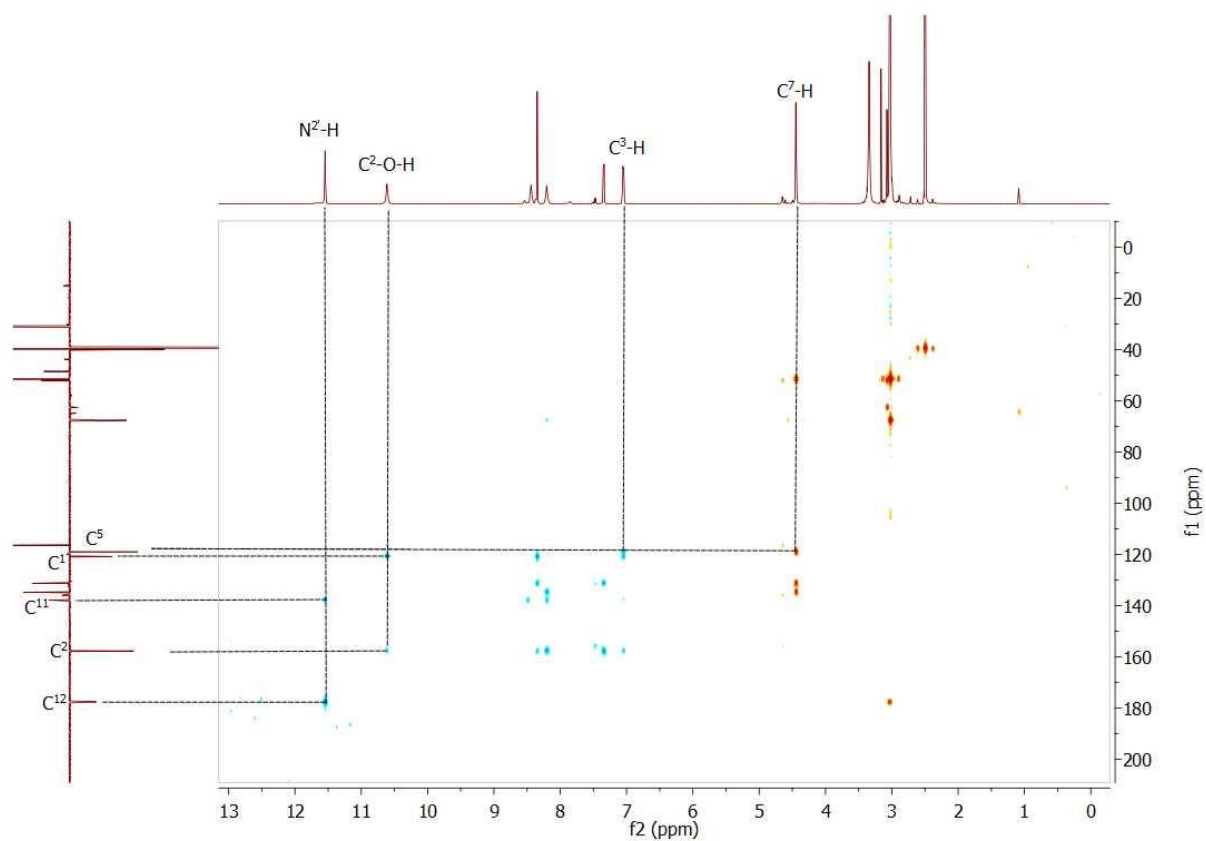

Figure 8.  $^1\text{H}$ ,  $^{13}\text{C}$  HMBC NMR spectrum of  $[\text{H}_2\text{L}^{\text{Me}}]\text{Cl}$  in  $[\text{D}_6]\text{DMSO}$ .

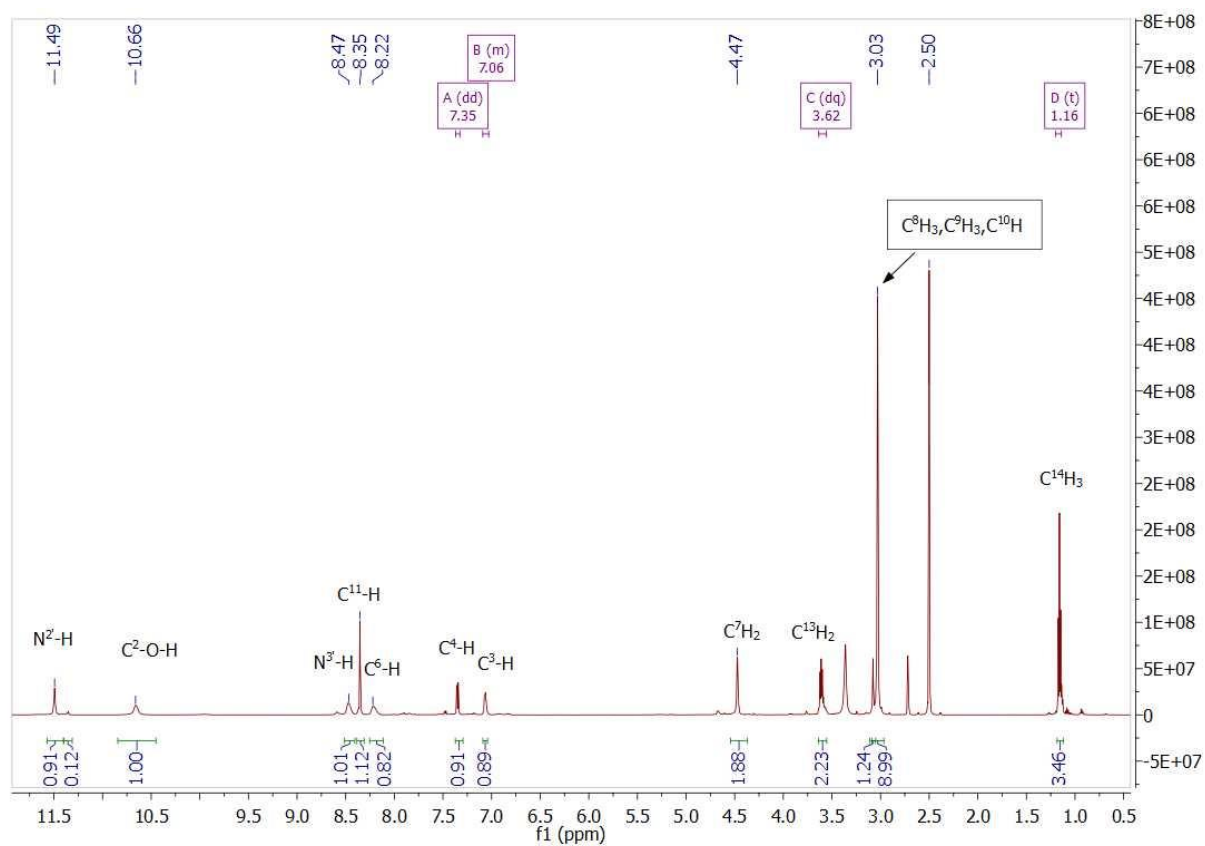

Figure 9.  $^1\text{H}$  NMR spectrum of  $[\text{H}_2\text{L}^{\text{Me}}]\text{Cl}$  in  $[\text{D}_6]\text{DMSO}$ .



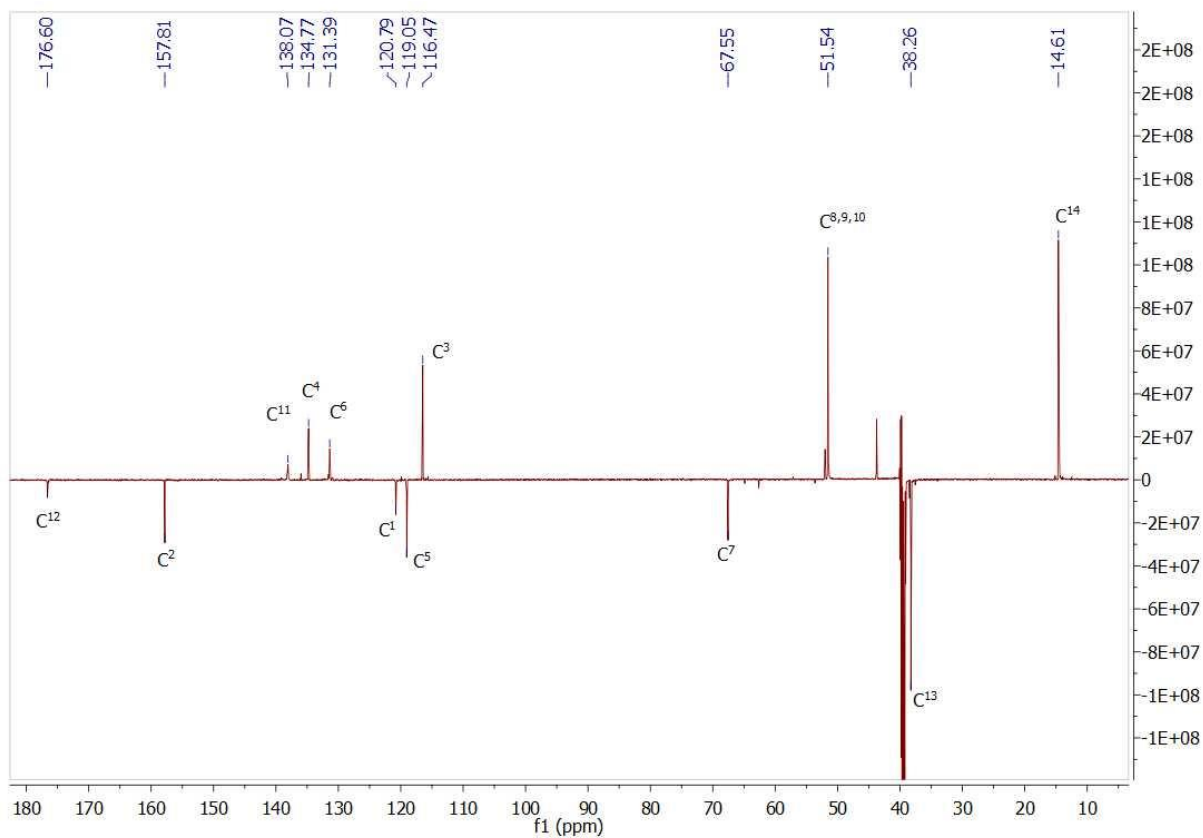

Figure 10.  $^{13}\text{C}$  NMR spectrum of  $[\text{H}_2\text{L}^{\text{Et}}]\text{Cl}$  in  $[\text{D}_6]\text{DMSO}$ .

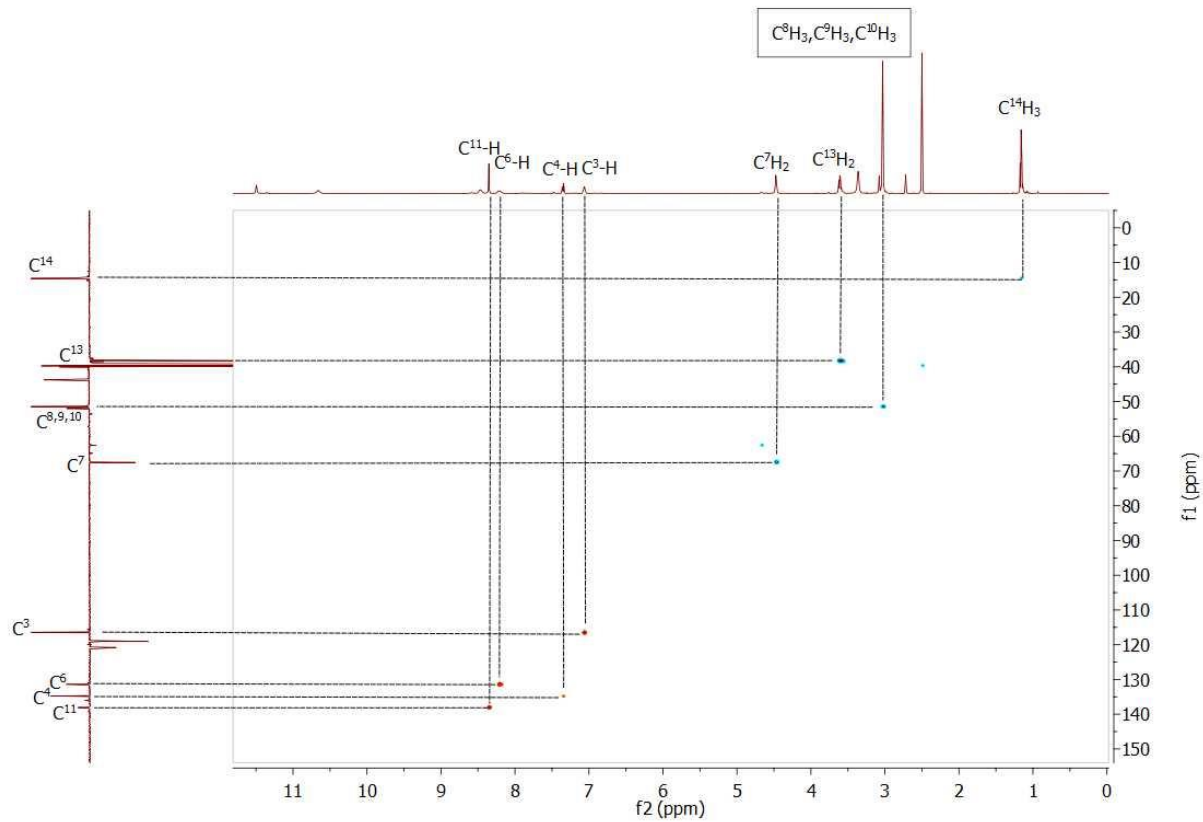

Figure 11.  $^1\text{H}$ ,  $^{13}\text{C}$  HSQC NMR spectrum of  $[\text{H}_2\text{L}^{\text{Et}}]\text{Cl}$  in  $[\text{D}_6]\text{DMSO}$ .

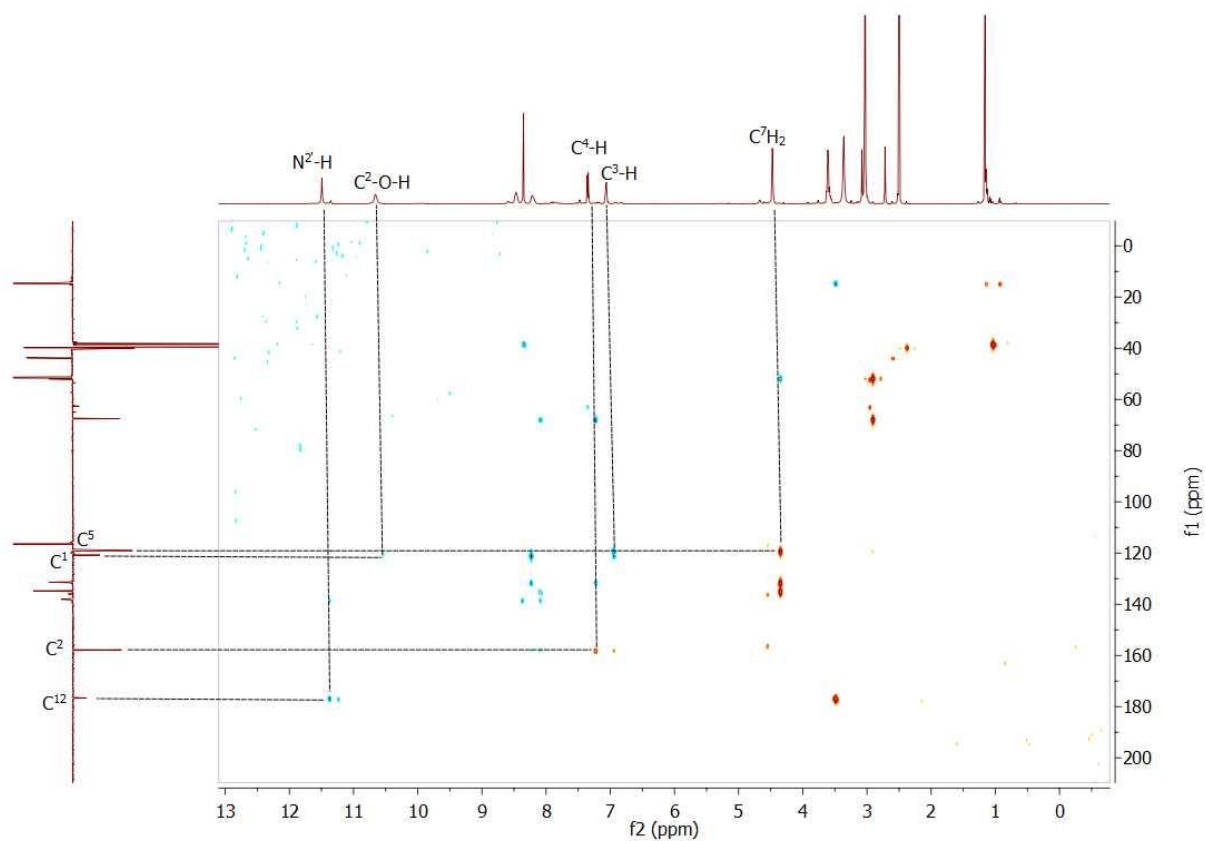

Figure 12.  $^1\text{H}$ ,  $^{13}\text{C}$  HMBC NMR spectrum of  $[\text{H}_2\text{L}^{\text{Et}}]\text{Cl}$  in  $[\text{D}_6]\text{DMSO}$ .

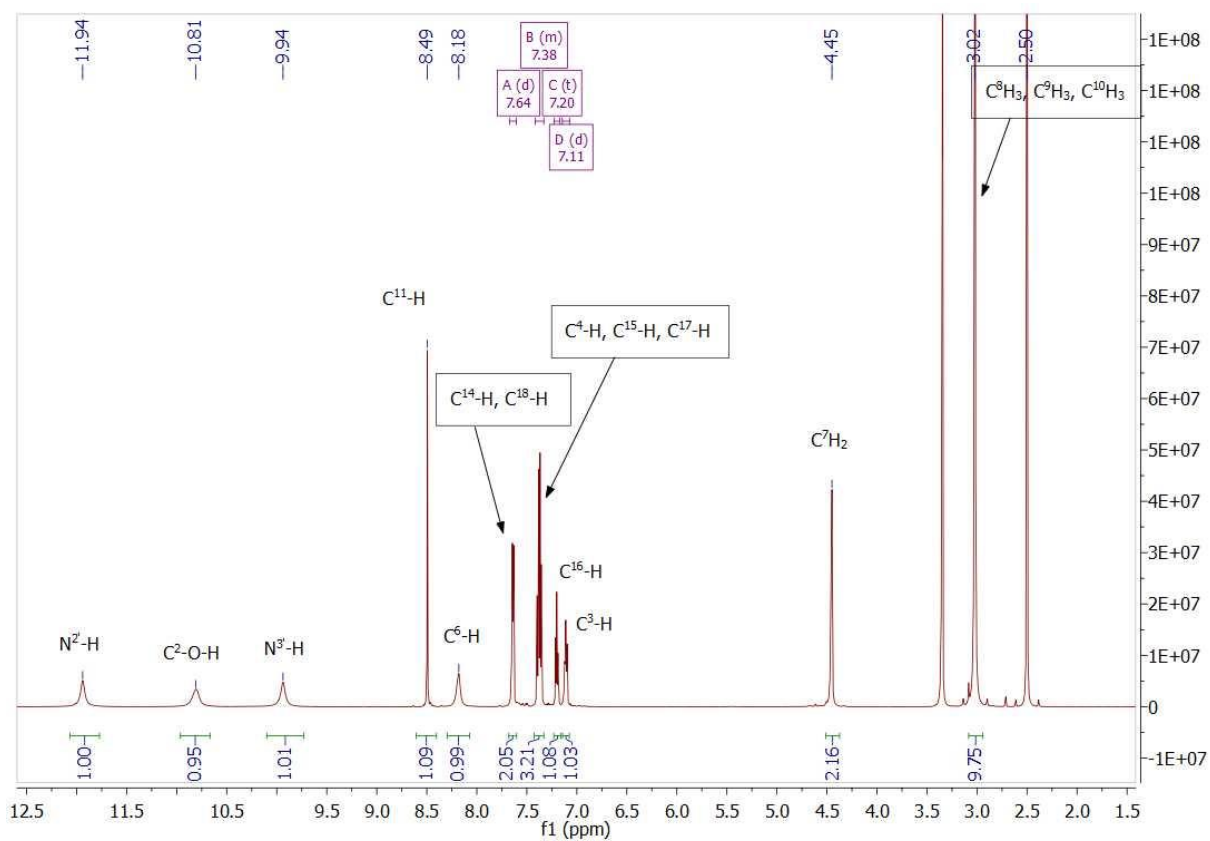

Figure 13.  $^1\text{H}$  NMR spectrum of  $[\text{H}_2\text{L}^{\text{Ph}}]\text{Cl}$  in  $[\text{D}_6]\text{DMSO}$ .

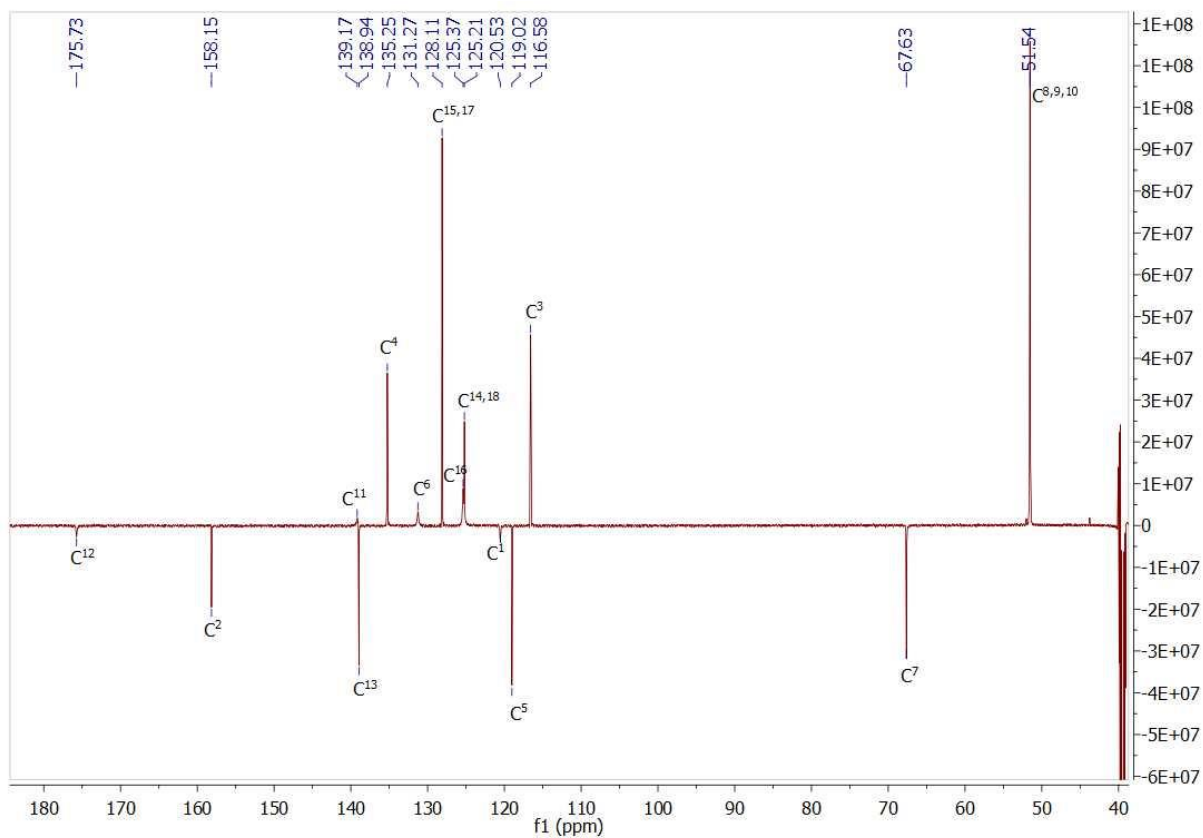

Figure 14.  $^{13}\text{C}$  NMR spectrum of  $[\text{H}_2\text{L}^{\text{Ph}}]\text{Cl}$  in  $[\text{D}_6]\text{DMSO}$ .

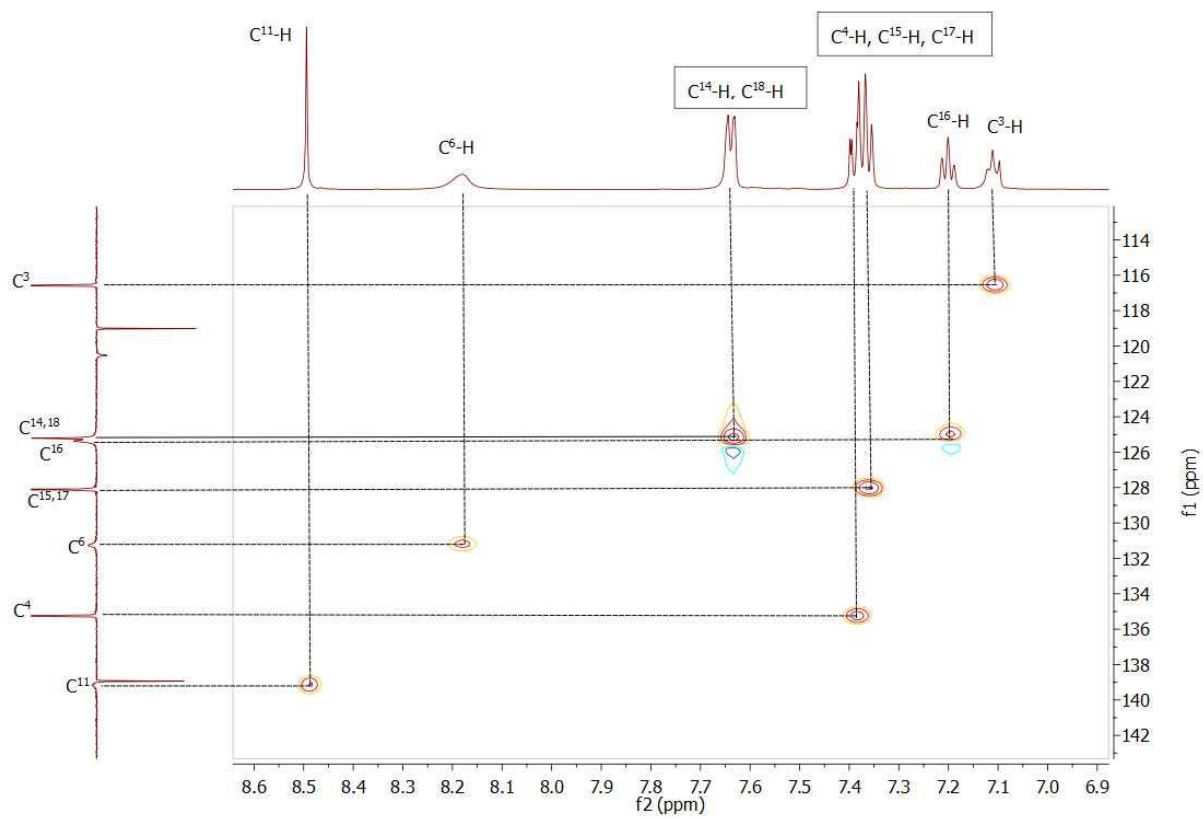

Figure 15.  $^1\text{H}$ ,  $^{13}\text{C}$  HSQC NMR spectrum of  $[\text{H}_2\text{L}^{\text{Ph}}]\text{Cl}$  in  $[\text{D}_6]\text{DMSO}$ .

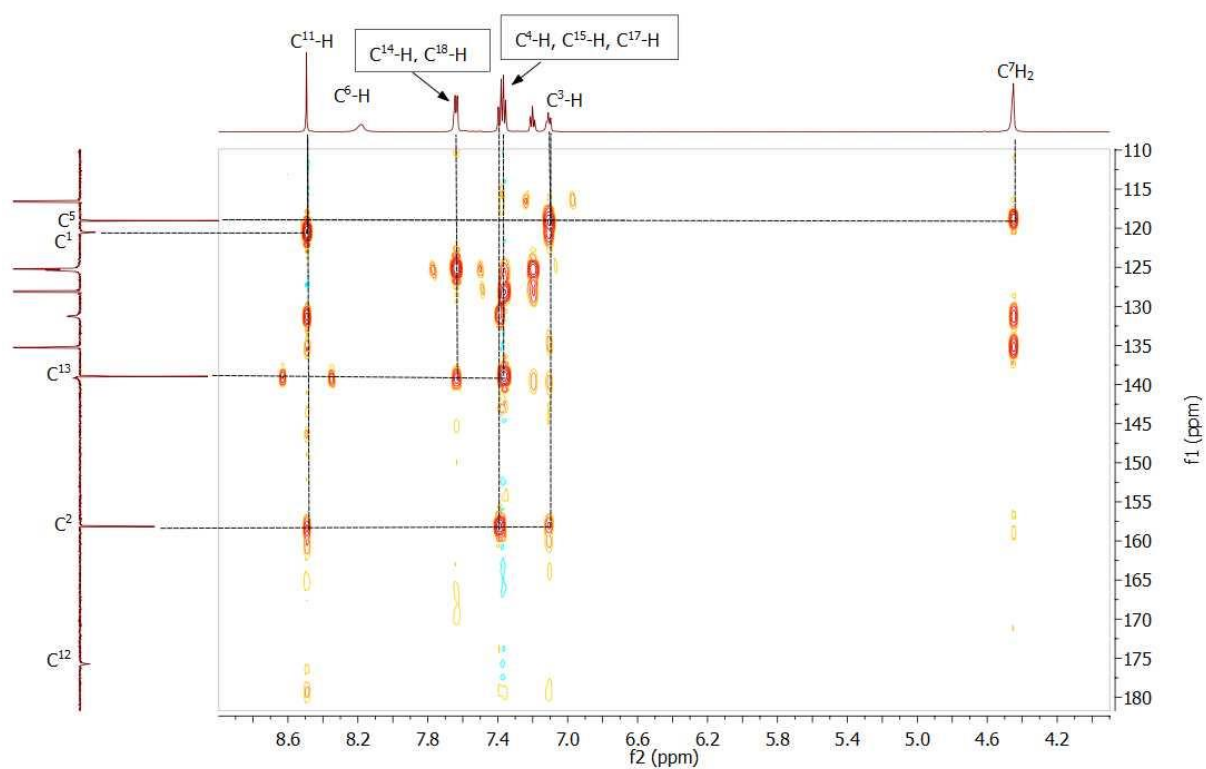

**Figure 16.** The fragment of  $^1\text{H}$ ,  $^{13}\text{C}$  HMBC NMR spectrum of  $[\text{H}_2\text{L}^{\text{Ph}}]\text{Cl}$  in  $[\text{D}_6]\text{DMSO}$ .

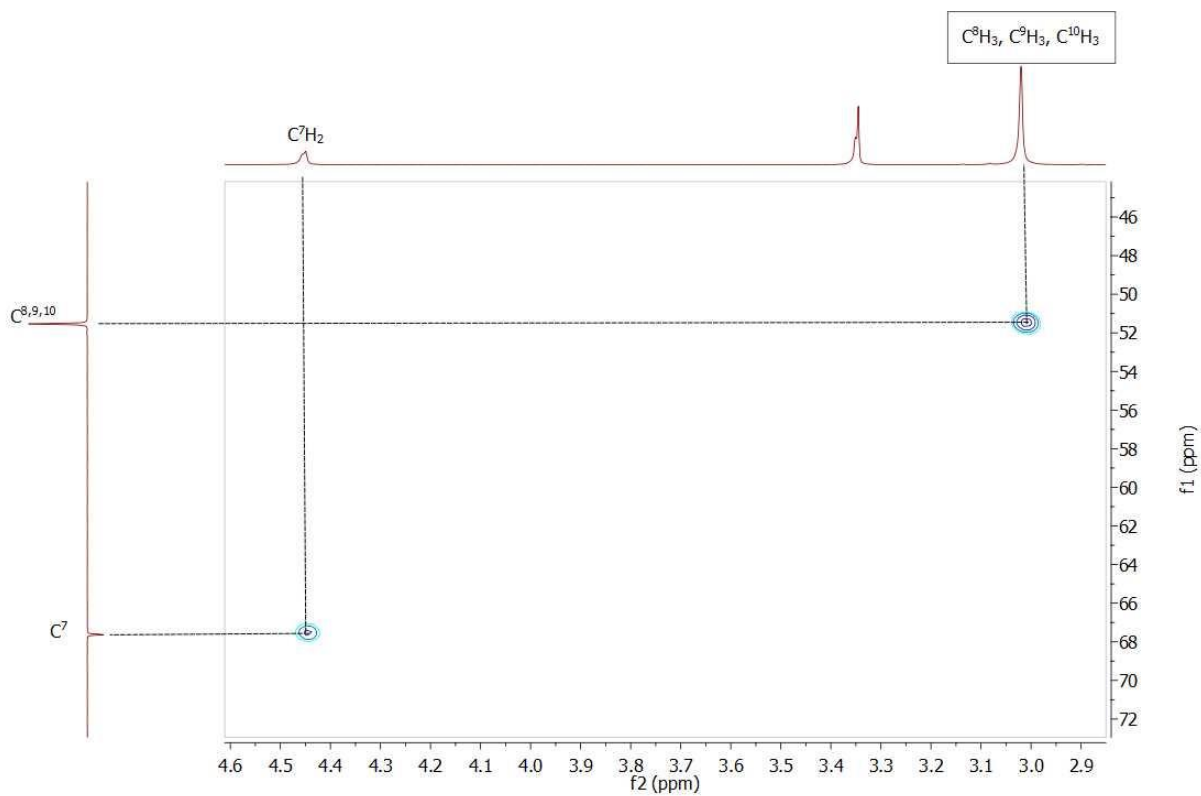

**Figure 17.** The fragment of  $^1\text{H}$ ,  $^{13}\text{C}$  HMBC NMR spectrum of  $[\text{H}_2\text{L}^{\text{Ph}}]\text{Cl}$  in  $[\text{D}_6]\text{DMSO}$ .

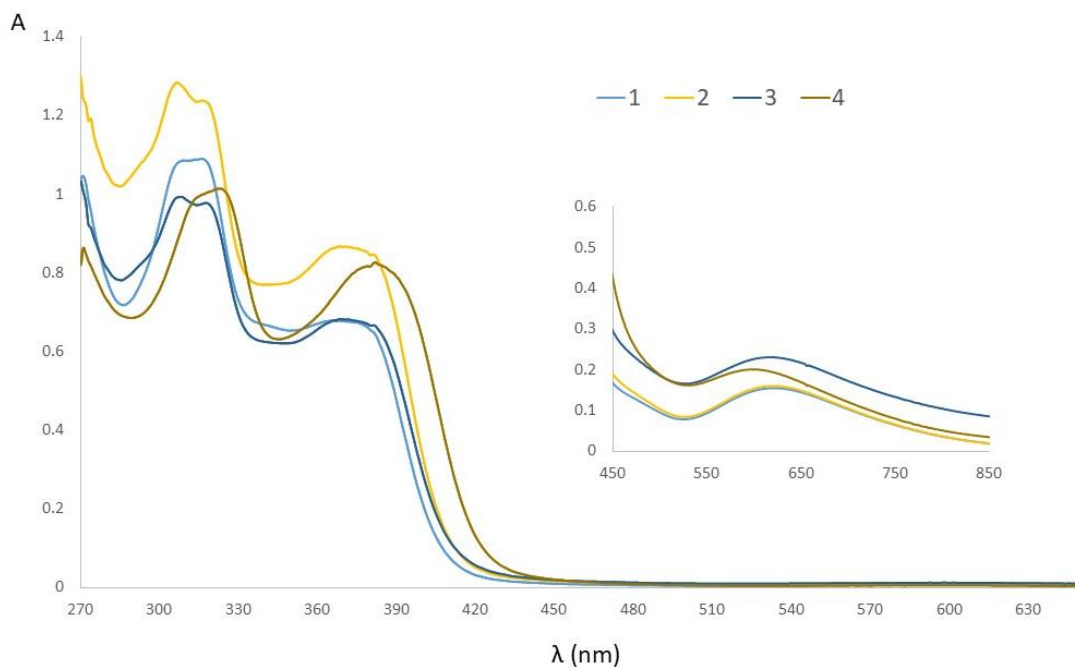

**Figure 18.** UV/Vis absorption spectra of copper(II) complexes **1** ( $c_1 = 59 \mu\text{M}$ ), **2** ( $c_2 = 51 \mu\text{M}$ ), **3** ( $c_3 = 56 \mu\text{M}$ ) and **4** ( $c_4 = 50 \mu\text{M}$ ) in aqueous solutions (path length 1 cm).

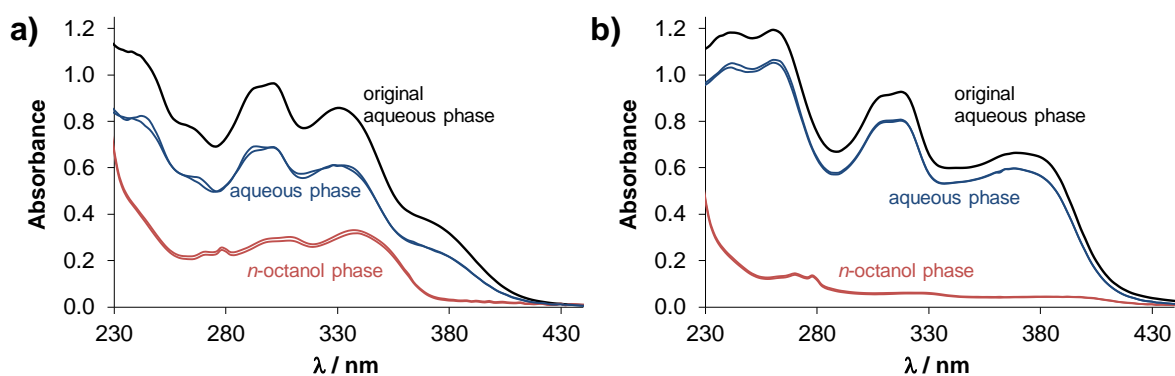

**Figure 19.** (a) UV/Vis absorption spectra recorded for proligand  $[\text{H}_2\text{L}^{\text{Me}}]\text{Cl}$  and (b) its copper(II) complex **2** in aqueous solution before (black line) and after (blue lines) partitioning and in the *n*-octanol phase (red lines) after the partitioning (pH = 7.4 (20 mM PBS);  $I = 0.1 \text{ M}$  (KCl);  $t = 25 \text{ }^\circ\text{C}$ ).

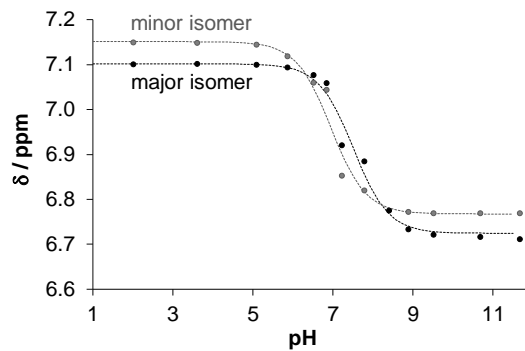

**Figure 20.** Chemical shifts of the CH(4) proton of the major (●) and minor (●) isomers of  $[\text{H}_2\text{L}^{\text{H}}]\text{Cl}$  plotted against the pH values in addition to the fitted curves (dashed lines) ( $c_L = 200 \mu\text{M}$ ;  $I = 0.1 \text{ M}$  (KCl);  $t = 25 \text{ }^\circ\text{C}$ ; 10% (v/v)  $\text{D}_2\text{O}/\text{H}_2\text{O}$ ).

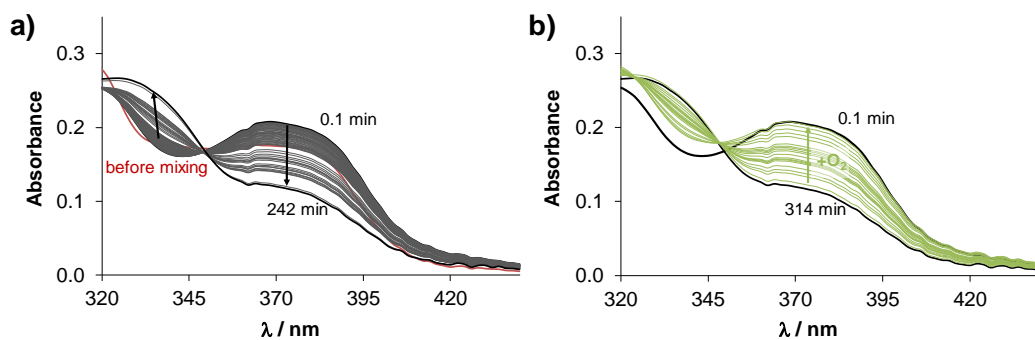

**Figure 21.** (a) Time-dependent UV/Vis absorption spectra of complex **1** in the presence of 50 equiv GSH before (red line) and after mixing their solutions (black lines) in a tandem cuvette. (b) Absorbance changes after bubbling oxygen into the reaction mixture (green lines); (pH = 7.4 (50 mM HEPES));  $c_{\text{complex}} = 25 \mu\text{M}$ ;  $c_{\text{GSH}} = 1.25 \text{ mM}$ ;  $I = 0.1 \text{ M}$  (KCl);  $t = 25 \text{ }^\circ\text{C}$ ).

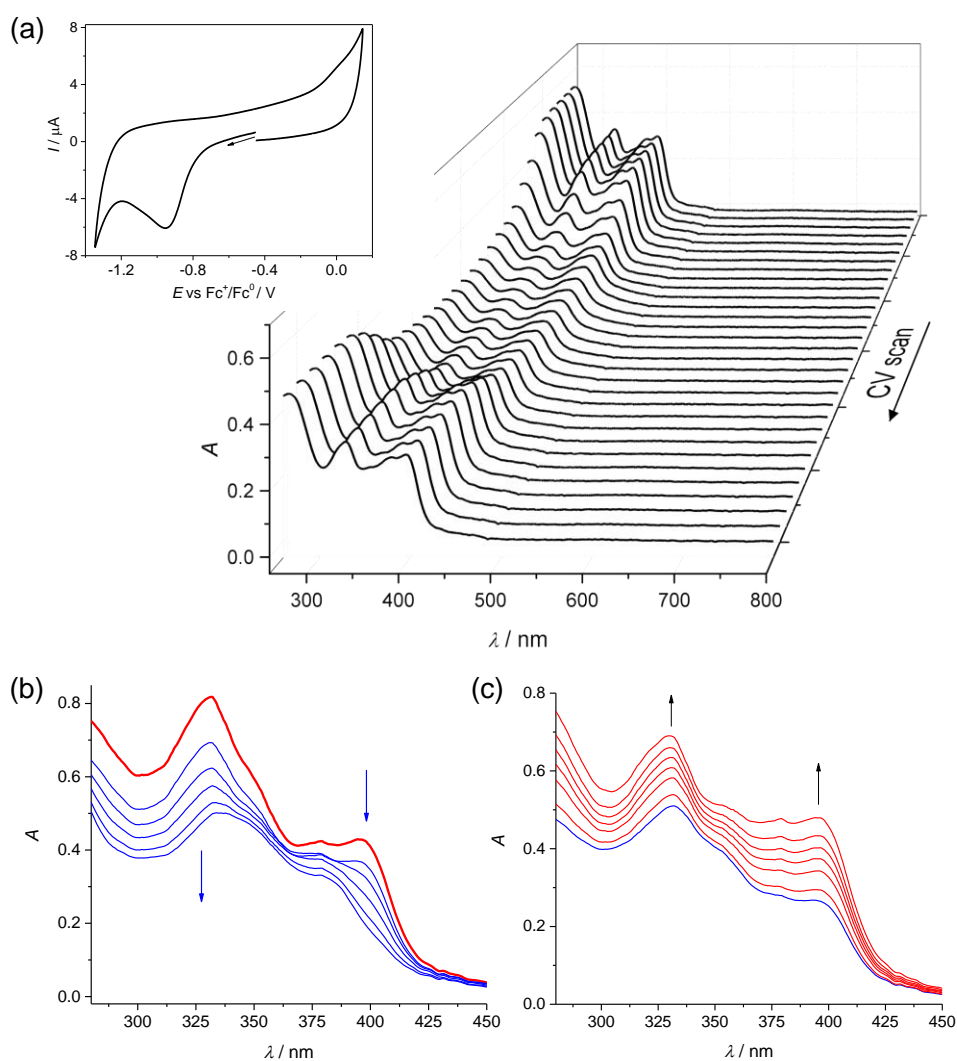

**Figure 22.** (a) UV/Vis spectra measured during cyclic voltammetry of **2** in MeCN/0.1 M  $n\text{Bu}_4\text{NPF}_6$  (Inset: the corresponding in situ cyclic voltammogram) and (b) during prolonged cathodic reduction of **3** in MeCN/0.1 M  $n\text{Bu}_4\text{NPF}_6$  at the first reduction peak and (c) their recovery observed upon reoxidation during reverse scan (scan rate  $10 \text{ mV s}^{-1}$ ).

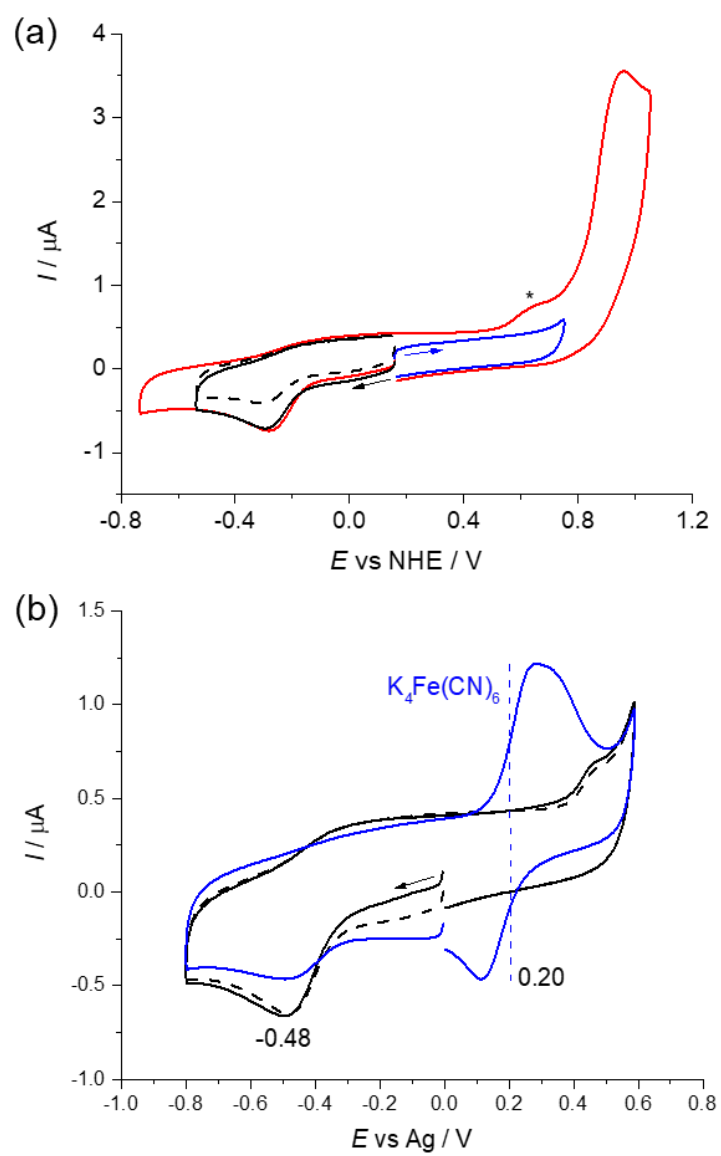

**Figure 23.** Cyclic voltammograms of (a) 1 and (b) 3 in phosphate buffer in the presence of 0.1 M KCl (pH 7) using a glassy carbon disc electrode at scan rate of  $100 \text{ mV s}^{-1}$ .

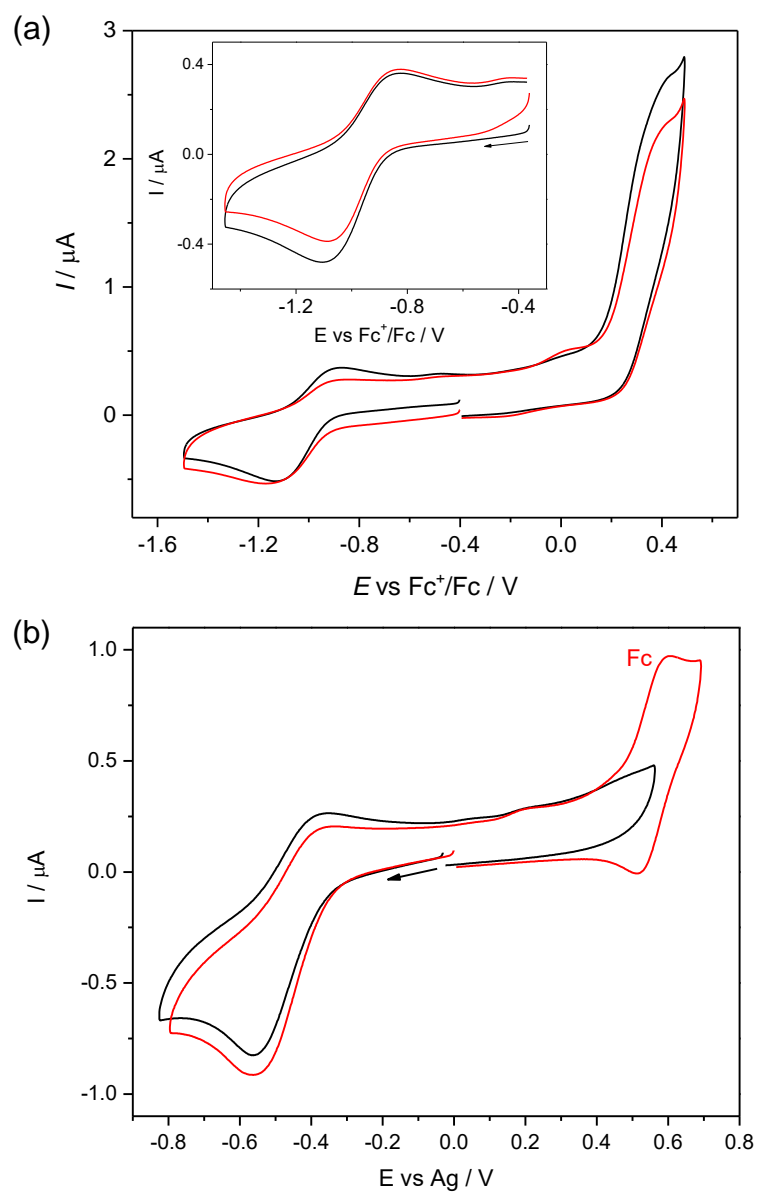

**Figure 24.** (a) Cyclic voltammograms of **2** in DMSO/*n*Bu<sub>4</sub>NPF<sub>6</sub> using a glassy carbon disc working electrode. Inset: the cyclic voltammograms in the cathodic part (two consecutive scans, scan rate of 100 mV s<sup>-1</sup>). (b) Cyclic voltammograms of **2** in DMSO/*n*Bu<sub>4</sub>NPF<sub>6</sub> using a Pt-disc working electrode in the absence (black line) and in the presence (red line) of ferrocene.



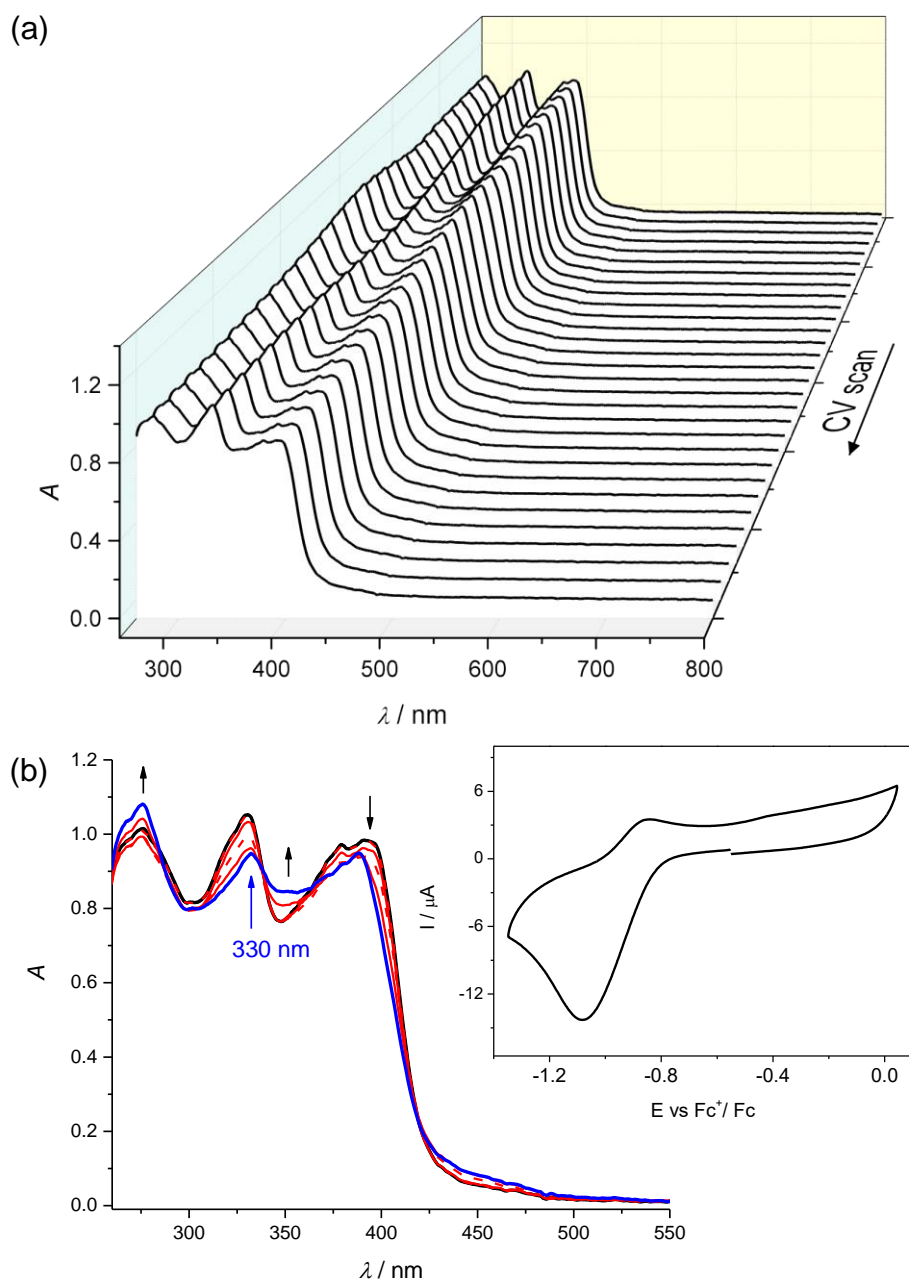

**Figure 25.** (a) UV/Vis spectra measured during cyclic voltammetry of **2** in DMSO/0.1 M *n*Bu<sub>4</sub>NPF<sub>6</sub>. (b) Selected UV/Vis spectra measured during the forward scan. Inset: the corresponding in situ cyclic voltammogram (scan rate 10 mV s<sup>-1</sup>).

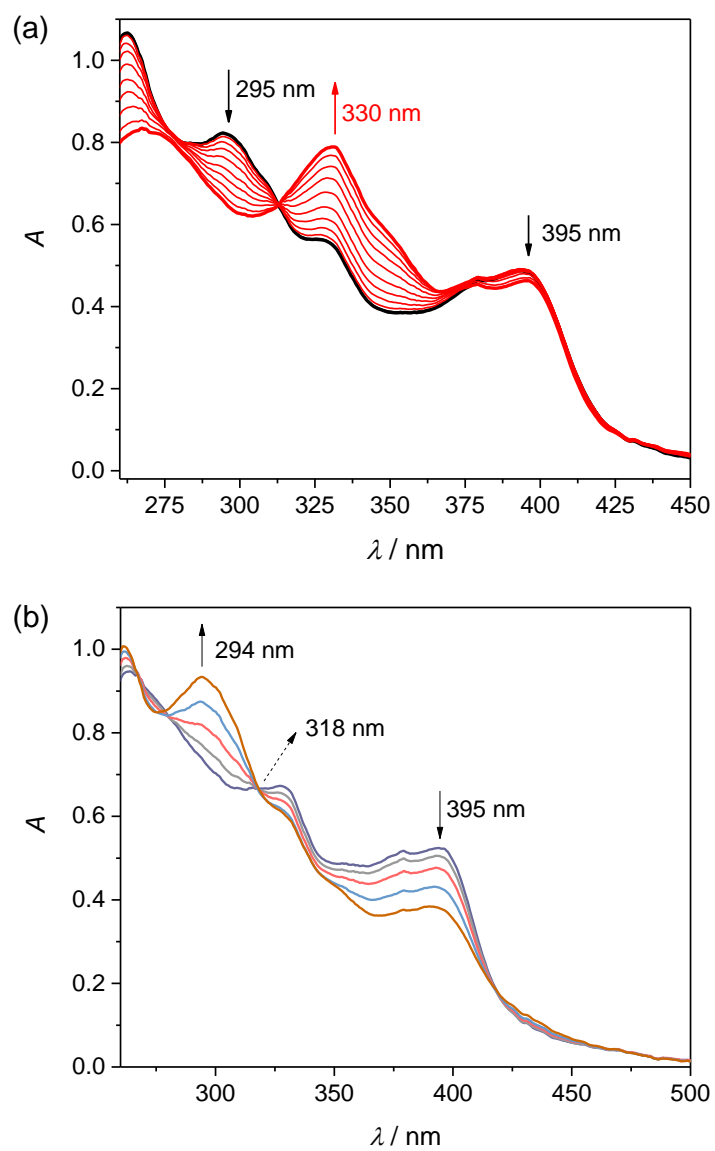

**Figure 26.** UV/Vis spectra measured upon (a) cathodic reduction and (b) anodic oxidation of **3** in MeCN/0.1 M *n*Bu<sub>4</sub>NPF<sub>6</sub> (forward scans, scan rate 10 mV s<sup>-1</sup>).

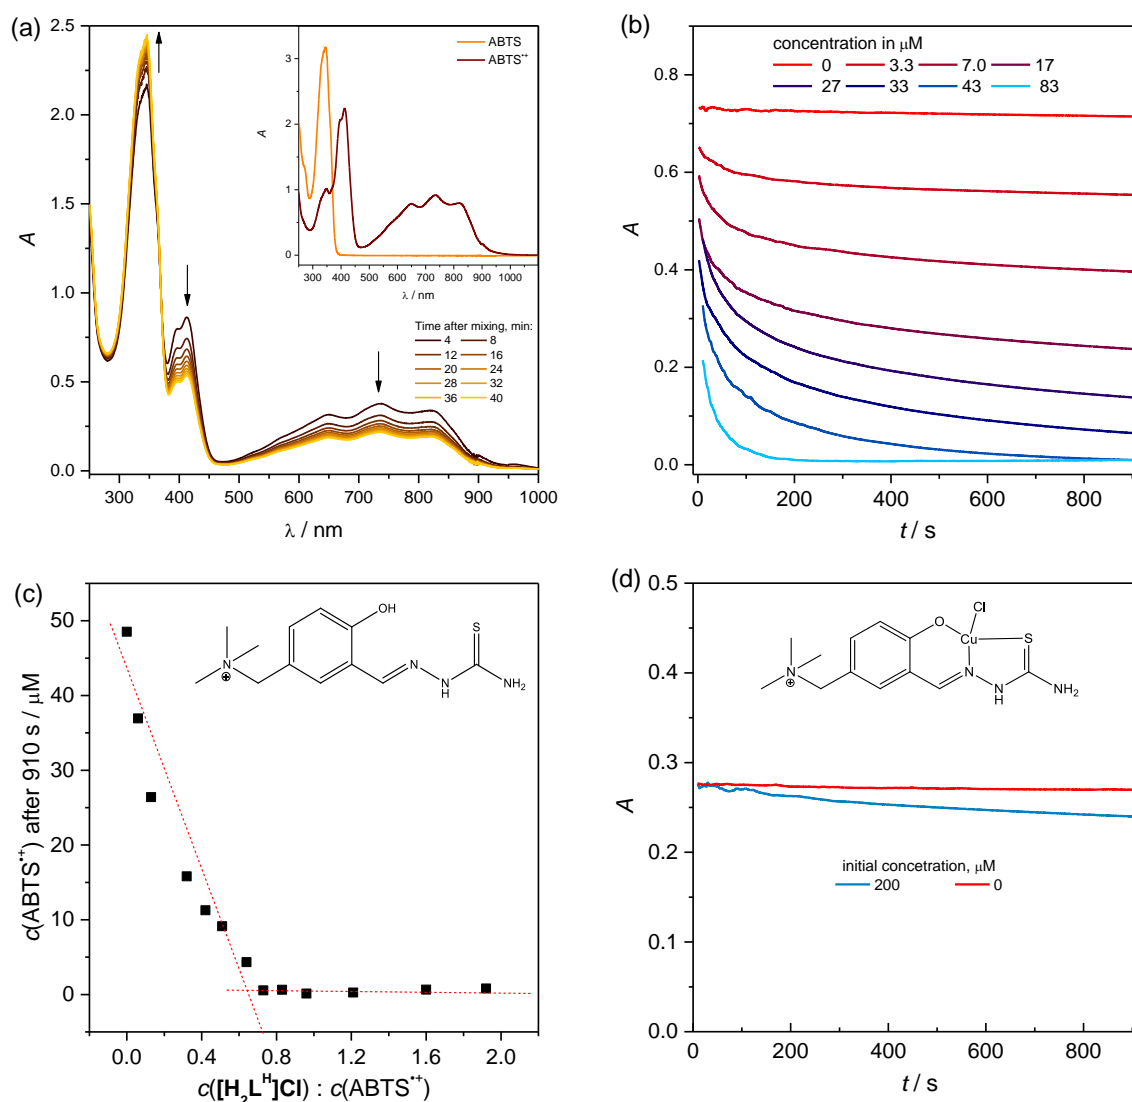

**Figure 27.** (a) Set of electronic absorption spectra of ABTS<sup>•+</sup> measured after mixing in [H<sub>2</sub>L<sup>H</sup>]Cl system ( $c_{in}(ABTS^{•+}) = 48.5 \mu\text{M}$ ;  $c_{in,[H_2L^H]Cl} = 10 \mu\text{M}$ , DMSO content 20% (v/v)); inset in (a) represents the electronic absorption spectra of ABTS<sup>•+</sup> radical cation and its parent molecule ABTS in mixed solvent water: DMSO (20% (v/v)); (b) Changes in ABTS<sup>•+</sup> absorption at 735 nm monitored after mixing [H<sub>2</sub>L<sup>H</sup>]Cl DMSO solutions with ABTS<sup>•+</sup> ( $c_{in}(ABTS^{•+}) = 48.5 \mu\text{M}$ ; The initial concentrations of [H<sub>2</sub>L<sup>H</sup>]Cl are marked in Figure; DMSO content 20% (v/v)); (c) Concentration of ABTS<sup>•+</sup> measured 910 s after mixing with [H<sub>2</sub>L<sup>H</sup>]Cl quoted upon increasing initial molar ratios [H<sub>2</sub>L<sup>H</sup>]Cl / ABTS<sup>•+</sup>; (d) Changes in ABTS<sup>•+</sup> absorption at 735 nm monitored after mixing DMSO solutions of **1** with ABTS<sup>•+</sup> ( $c_{in}(ABTS^{•+}) = 18 \mu\text{M}$ ; The initial concentrations of **1** are indicated in the Figure; DMSO content 20% (v/v)).
